# Supplementary material for: Circulating basophil count as a prognostic marker of tumor aggressiveness and survival outcomes in colorectal cancer
Source: PubMed Central journal article supplement (PMC7008108; doi:10.1186/s40169-019-0255-4), 2020-02-10

Figure S1. Receiver operating characteristic curves for immune/inflammation-related biomarkers in blood routine examination, including basophil, white blood cell (WBC), platelet, neutrophil, lymphocyte, monocyte and eosinophil.

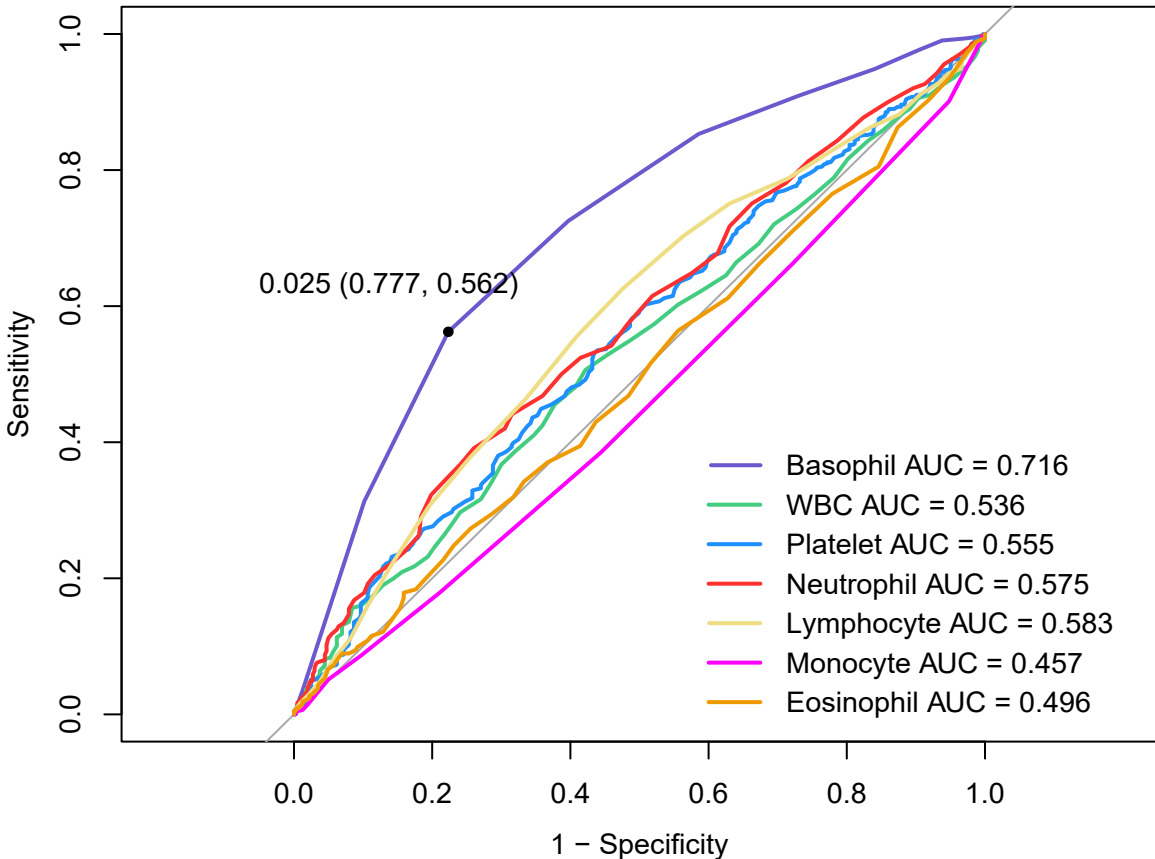

Supplement: 40169_2019_255_MOESM1_ESM.pdf [file 40169_2019_255_MOESM1_ESM.pdf]
