# Supplementary material for: Circulating basophil count as a prognostic marker of tumor aggressiveness and survival outcomes in colorectal cancer
Source: PubMed Central journal article supplement (PMC7008108; doi:10.1186/s40169-019-0255-4), 2020-02-10

**A**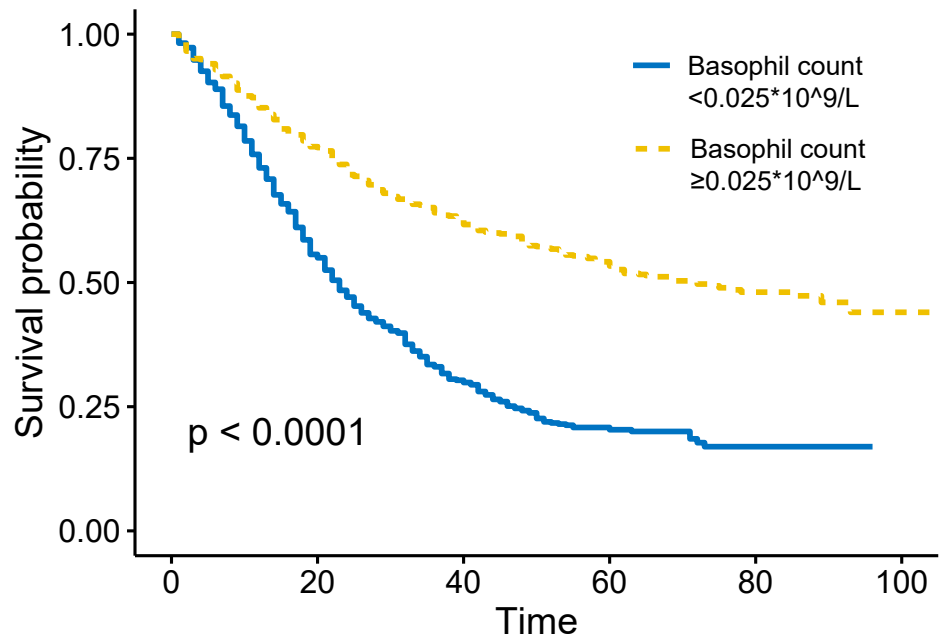**B**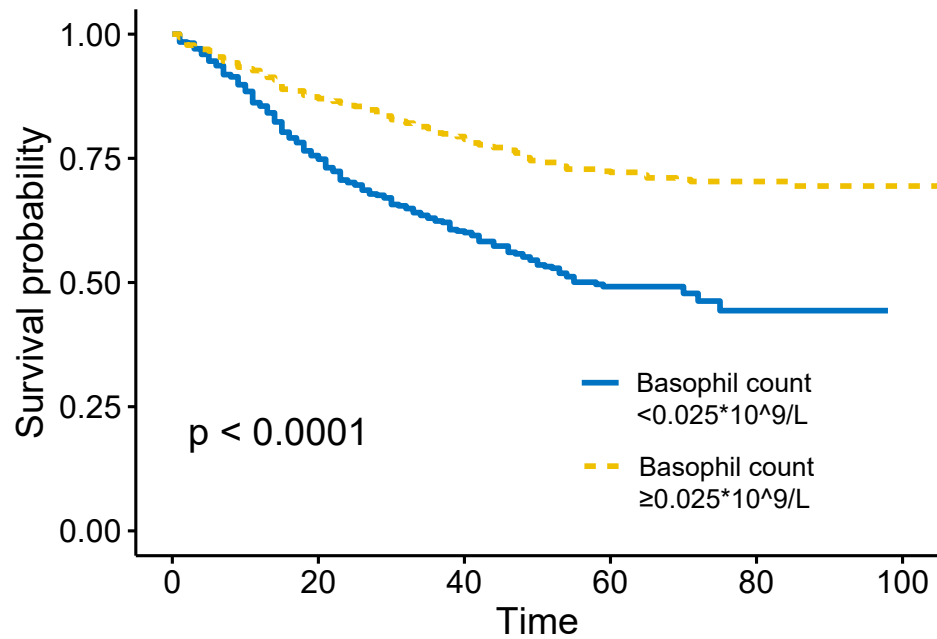

Supplement: 40169_2019_255_MOESM3_ESM.pdf [file 40169_2019_255_MOESM3_ESM.pdf]
